# Supplementary material
Source: publisher figshare collection journal article supplement (https://geolsoc.figshare.com/ndownloader/files/25778060)

Reef  
Platform int. 1  
Platform int. 2

Current deposits  
Hemipelagic

Siliciclastic  
Gravity deposits/  
locally reworked  
Pelagic  
Hiatus

Time lines  
(0.25 Myrs)  
Fault strike  
Wind

## Model Run 1: base model

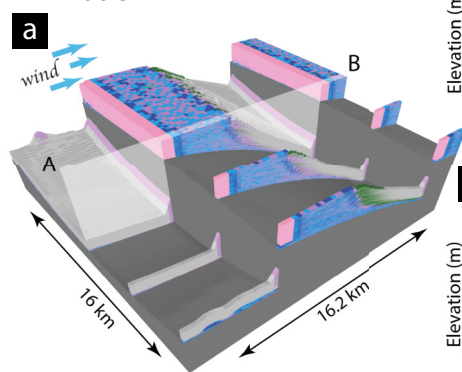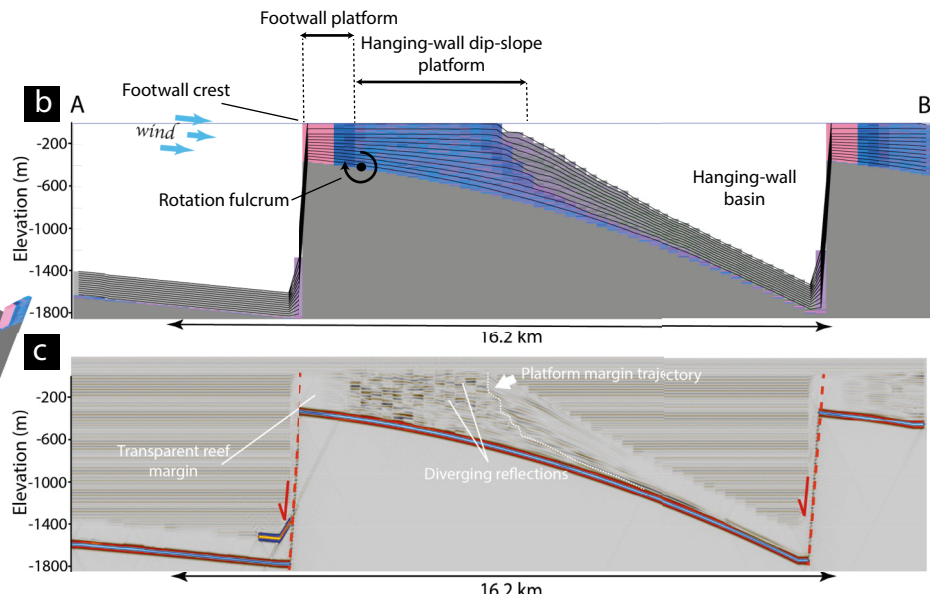

## Model Run 2: eustatic control

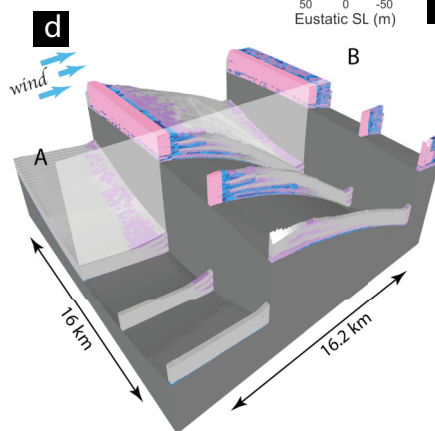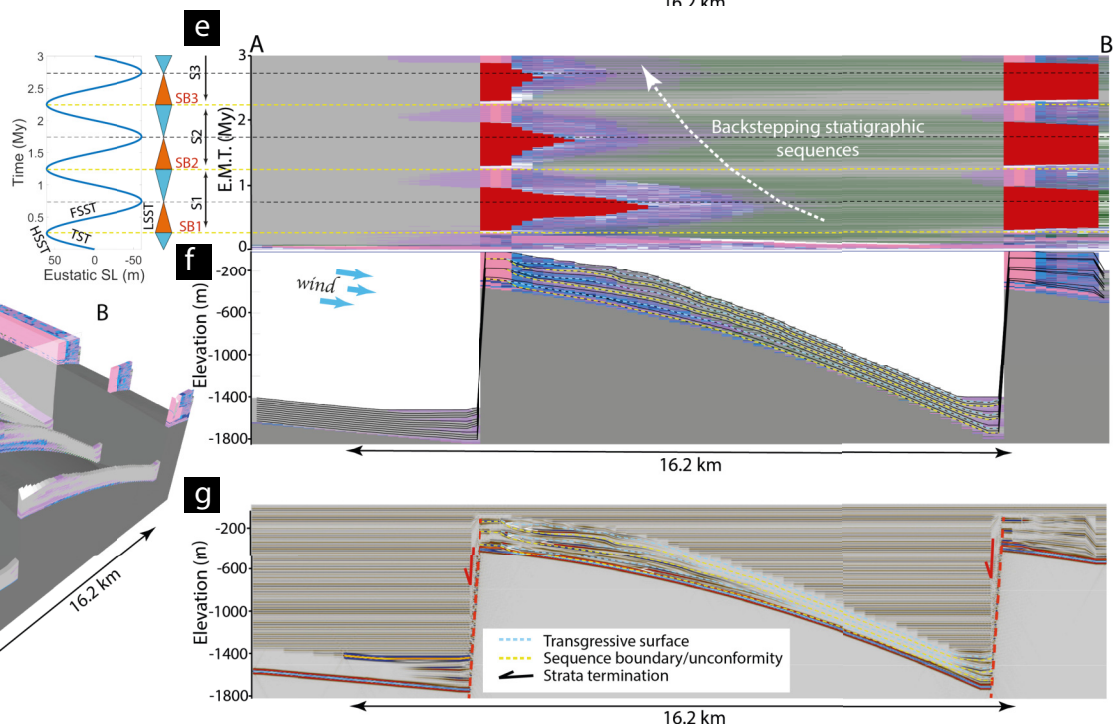

Supplement: Supplementary file 1 [file 25778060]
